# Supplementary material
Source: PubMed Central journal article supplement (PMC3143394)
Supplement: 97320630006330S1.pdf [file 97320630006330S1.pdf]

## Supplementary material:

**Table 1:** Docking results of 1-(substituted phenyl)-3-(naphtha[1,2-*d*]thiazol-2-yl)urea/thiourea derivatives with AA<sub>23</sub>R. Data of % reduction in catalepsy were taken from reference [10]. Compound number is same as given in the literature. <sup>a</sup>)Binding free energy (kcal/mol); <sup>b</sup>)Inhibition constant estimated by docking (in nM); <sup>c</sup>)Root mean square deviation (in Å); <sup>d</sup>)Amino acid; <sup>e</sup>)Bond distance (in Å); <sup>f</sup>)No H-bond or pi-interaction.

| Comp. | R                       | X | % Reduction in catalepsy | $\Delta G_b^a$ | $K_i^b$ | RMSD <sup>c</sup> | Hydrogen bonds  |                   | $\pi$ -Interactions |                   |
|-------|-------------------------|---|--------------------------|----------------|---------|-------------------|-----------------|-------------------|---------------------|-------------------|
|       |                         |   |                          |                |         |                   | AA <sup>d</sup> | Dist <sup>e</sup> | AA <sup>d</sup>     | Dist <sup>e</sup> |
| 3     | H                       | O | 44.44                    | -8.27          | 863.78  | 4.29              | <sup>f</sup>    | -                 | Phe-168             | 4.14              |
|       |                         |   |                          |                |         |                   |                 |                   | Phe-168             | 5.25              |
|       |                         |   |                          |                |         |                   |                 |                   | Phe-168             | 6.43              |
| 4     | 4-OCH <sub>3</sub>      | O | 58.51                    | -8.81          | 346.16  | 3.99              | Glu-169         | 2.16              | Phe-168             | 4.53              |
|       |                         |   |                          |                |         |                   | Tyr-271         | 1.95              | Phe-168             | 5.26              |
| 5     | 2-OCH <sub>3</sub>      | O | 76.9                     | -9.00          | 250.84  | 4.21              | Phe-168         | 1.97              | Phe-168             | 4.52              |
|       |                         |   |                          |                |         |                   | Tyr-271         | 1.94              | Phe-168             | 5.24              |
| 6     | 2,4-OCH <sub>3</sub>    | O | 75                       | -9.25          | 164.57  | 4.03              | Phe-168         | 2.15              | Phe-168             | 4.43              |
|       |                         |   |                          |                |         |                   | Glu-169         | 2.38              | Phe-168             | 5.14              |
|       |                         |   |                          |                |         |                   | Tyr-271         | 1.96              |                     |                   |
| 7     | 3,4,5-OCH <sub>3</sub>  | O | 70.29                    | -9.07          | 224.23  | 3.93              | His-278         | 1.87              | Phe-168             | 4.44              |
|       |                         |   |                          |                |         |                   |                 |                   | Phe-168             | 5.65              |
| 8     | 4-Phenoxy               | O | 55.56                    | -9.53          | 102.63  | 2.52              | <sup>f</sup>    | -                 | Phe-168             | 5.19              |
| 9     | 2-F                     | O | 29.12                    | -8.16          | 1040    | 4.85              | Phe-168         | 2.02              | <sup>f</sup>        | -                 |
|       |                         |   |                          |                |         |                   | Tyr-271         | 2.08              |                     |                   |
| 10    | 4-F                     | O | 30.3                     | -8.14          | 1080    | 4.83              | Phe-168         | 2.07              | <sup>f</sup>        | -                 |
|       |                         |   |                          |                |         |                   | Tyr-271         | 2.05              |                     |                   |
| 11    | 2-Br                    | O | 38.74                    | -8.72          | 405.86  | 4.15              | Tyr-271         | 2.18              | Phe-168             | 4.55              |
|       |                         |   |                          |                |         |                   |                 |                   | Phe-168             | 5.26              |
| 12    | 4-Br                    | O | 37.76                    | -8.55          | 542.28  | 4.36              | Tyr-271         | 2.11              | Phe-168             | 4.61              |
|       |                         |   |                          |                |         |                   |                 |                   | Phe-168             | 5.19              |
| 13    | 2-Cl                    | O | 37.37                    | -8.54          | 546.60  | 4.09              | Tyr-271         | 2.22              | Phe-168             | 4.54              |
|       |                         |   |                          |                |         |                   |                 |                   | Phe-168             | 5.28              |
| 14    | 4-Cl                    | O | 38.61                    | -8.38          | 721.26  | 4.34              | Tyr-271         | 2.09              | Phe-168             | 4.60              |
|       |                         |   |                          |                |         |                   |                 |                   | Phe-168             | 5.19              |
| 15    | 2-Cl, 5-CF <sub>3</sub> | O | 51.37                    | -8.94          | 281.80  | 4.1               | Tyr-271         | 2.13              | <sup>f</sup>        | -                 |
| 16    | 2-NO <sub>2</sub>       | O | 72.05                    | -9.87          | 58.72   | 4.69              | Glu-169         | 2.1               | <sup>f</sup>        | -                 |
|       |                         |   |                          |                |         |                   | Glu-169         | 2.1               |                     |                   |
| 17    | 4-NO <sub>2</sub>       | O | 31.28                    | -8.61          | 484.40  | 3.93              | Val-84          | 2.04              | Phe-168             | 5.11              |
| 18    | 2-CH <sub>3</sub>       | O | 47.64                    | -8.46          | 626.58  | 4.01              | Phe-168         | 1.74              | Phe-168             | 4.13              |
|       |                         |   |                          |                |         |                   | Tyr-271         | 1.89              | Phe-168             | 4.57              |
|       |                         |   |                          |                |         |                   |                 |                   | Phe-168             | 6.03              |
| 19    | 4-CH <sub>3</sub>       | O | 48.56                    | -8.65          | 455.03  | 4.03              | <sup>f</sup>    | -                 | Phe-168             | 4.38              |
|       |                         |   |                          |                |         |                   |                 |                   | Phe-168             | 5.45              |
|       |                         |   |                          |                |         |                   |                 |                   | Phe-168             | 6.38              |
| 20    | H                       | S | 44.63                    | -8.45          | 636.96  | 3.95              | Ala-81          | 2.17              | <sup>f</sup>        | -                 |
| 21    | 4-OCH <sub>3</sub>      | S | 58.05                    | -9.26          | 162.54  | 5.02              | Glu-169         | 2.09              | Phe-168             | 4.27              |
|       |                         |   |                          |                |         |                   | Tyr-271         | 1.88              | Phe-168             | 3.76              |
|       |                         |   |                          |                |         |                   |                 |                   | Phe-168             | 3.95              |
| 22    | 2-OCH <sub>3</sub>      | S | 75.46                    | -9.06          | 229.22  | 2.72              | Glu-169         | 1.95              | Phe-168             | 4.01              |
|       |                         |   |                          |                |         |                   | Asn-253         | 2.39              | Phe-168             | 5.26              |
|       |                         |   |                          |                |         |                   | Glu-169         | 1.98              |                     |                   |
|       |                         |   |                          |                |         |                   | Glu-169         | 3.19              |                     |                   |
|       |                         |   |                          |                |         |                   | Asn-253         | 3.02              |                     |                   |
| 23    | 2-F                     | S | 38.35                    | -8.18          | 1010    | 1.39              | <sup>f</sup>    | -                 | Phe-168             | 3.99              |
|       |                         |   |                          |                |         |                   |                 |                   | Phe-168             | 4.69              |
|       |                         |   |                          |                |         |                   |                 |                   | Phe-168             | 5.91              |
| 24    | 4-F                     | S | 34.95                    | -8.11          | 1130    | 4.24              | <sup>f</sup>    | -                 | Phe-168             | 3.91              |
|       |                         |   |                          |                |         |                   |                 |                   | Phe-168             | 3.81              |
|       |                         |   |                          |                |         |                   |                 |                   | Phe-168             | 4.45              |
| 25    | 2-Br                    | S | 30.96                    | -8.53          | 562.85  | 4.05              | <sup>f</sup>    | -                 | Phe-168             | 3.68              |
|       |                         |   |                          |                |         |                   |                 |                   | Phe-168             | 3.79              |
|       |                         |   |                          |                |         |                   |                 |                   | Phe-168             | 4.49              |
| 26    | 4-Br                    | S | 35.27                    | -8.75          | 388.83  | 4.22              | <sup>f</sup>    | -                 | -                   | -                 |
| 27    | 2-Cl                    | S | 39.14                    | -8.55          | 544.16  | 3.1               | <sup>f</sup>    | -                 | Phe-168             | 4.06              |
|       |                         |   |                          |                |         |                   |                 |                   | Phe-168             | 4.80              |

# BIOINFORMATION

*open access*

|    |                   |   |       |       |        |      |         |      |         |      |
|----|-------------------|---|-------|-------|--------|------|---------|------|---------|------|
| 28 | 4-Cl              | S | 27.88 | -8.68 | 432.38 | 4.05 | Tyr-271 | 2.22 | Phe-168 | 3.88 |
|    |                   |   |       |       |        |      |         |      | Phe-168 | 4.92 |
|    |                   |   |       |       |        |      |         |      | Phe-168 | 4.1  |
|    |                   |   |       |       |        |      |         |      | Phe-168 | 3.81 |
| 29 | 2-NO <sub>2</sub> | S | 72.97 | -9.61 | 90.07  | 2.63 | Phe-168 | 2.15 | -       | -    |
|    |                   |   |       |       |        |      | Phe-168 | 1.99 |         |      |
|    |                   |   |       |       |        |      | Ile-66  | 3.19 |         |      |
| 30 | 4-NO <sub>2</sub> | S | 32.13 | -8.72 | 405.62 | 4.45 | His-278 | 2.05 | Phe-168 | 3.95 |
|    |                   |   |       |       |        |      |         |      | Phe-168 | 3.99 |
|    |                   |   |       |       |        |      |         |      | Phe-168 | 4.33 |
| 31 | 2-CH <sub>3</sub> | S | 49.87 | -8.66 | 448.49 | 4.77 | f       | -    | Phe-168 | 4.12 |
|    |                   |   |       |       |        |      |         |      | Phe-168 | 4.81 |
|    |                   |   |       |       |        |      |         |      | Phe-168 | 6.27 |
| 32 | 4-CH <sub>3</sub> | S | 47.97 | -8.56 | 529.05 | 4.30 | f       | -    | Phe-168 | 4.18 |
|    |                   |   |       |       |        |      |         |      | Phe-168 | 5.00 |
|    |                   |   |       |       |        |      |         |      | Phe-168 | 6.26 |

---
